# Supplementary material
Source: MDPI journal article supplement (https://www.mdpi.com/2297-8739/9/12/432)
Supplement: s1 [file s1]

## Supplementary material

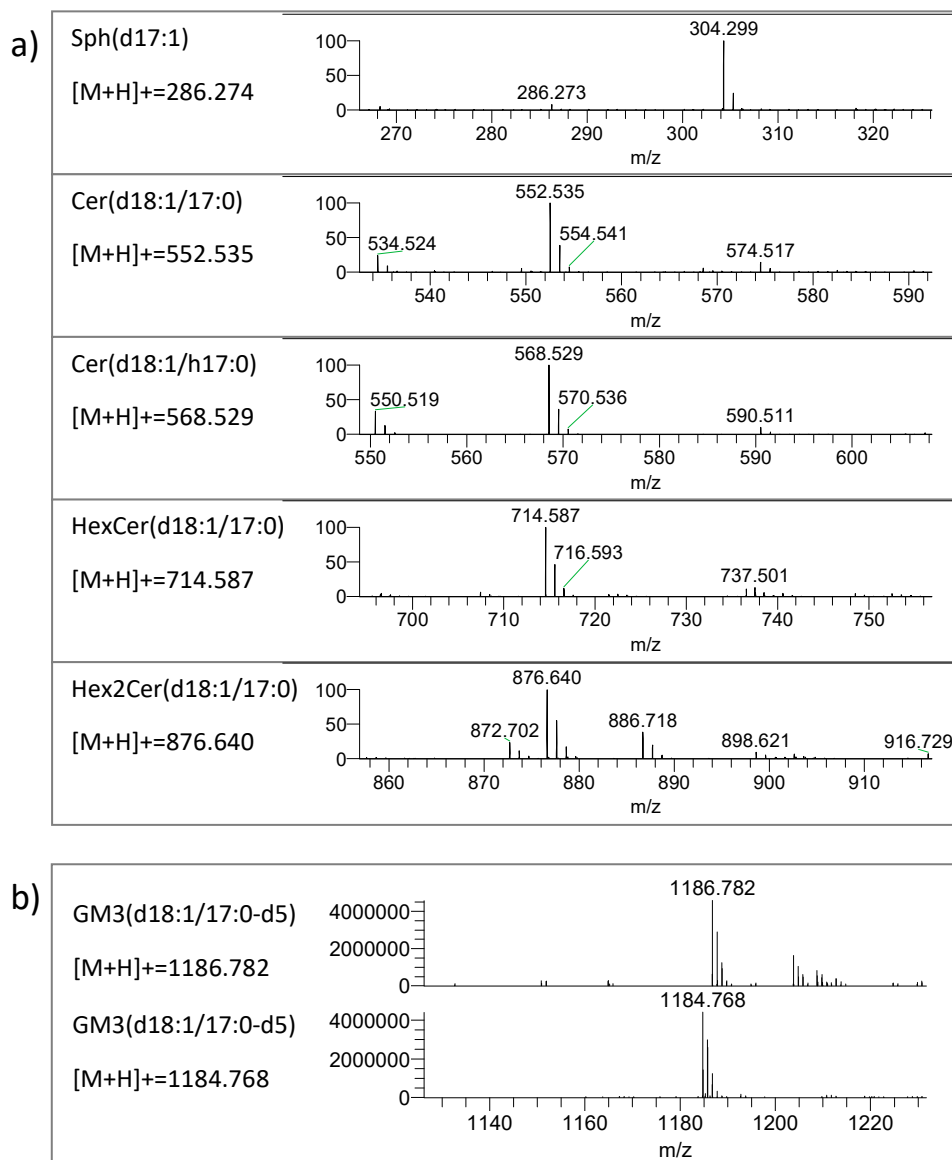

**Supplementary Figure S1: a) Zoomed region of the MS spectrum of the commercial standards used for method development in this work. The [M+H]<sup>+</sup> is observed as the predominant ion without significant contribution of other adducts, that should be observed along the m/z range represented. b). Zoomed region of the MS spectrum of GM3 standard in both positive - upper panel, and negative polarity-lower panel. Similar intensities are observed, according to the absolute signal scale used, to this end, along the y axis.**

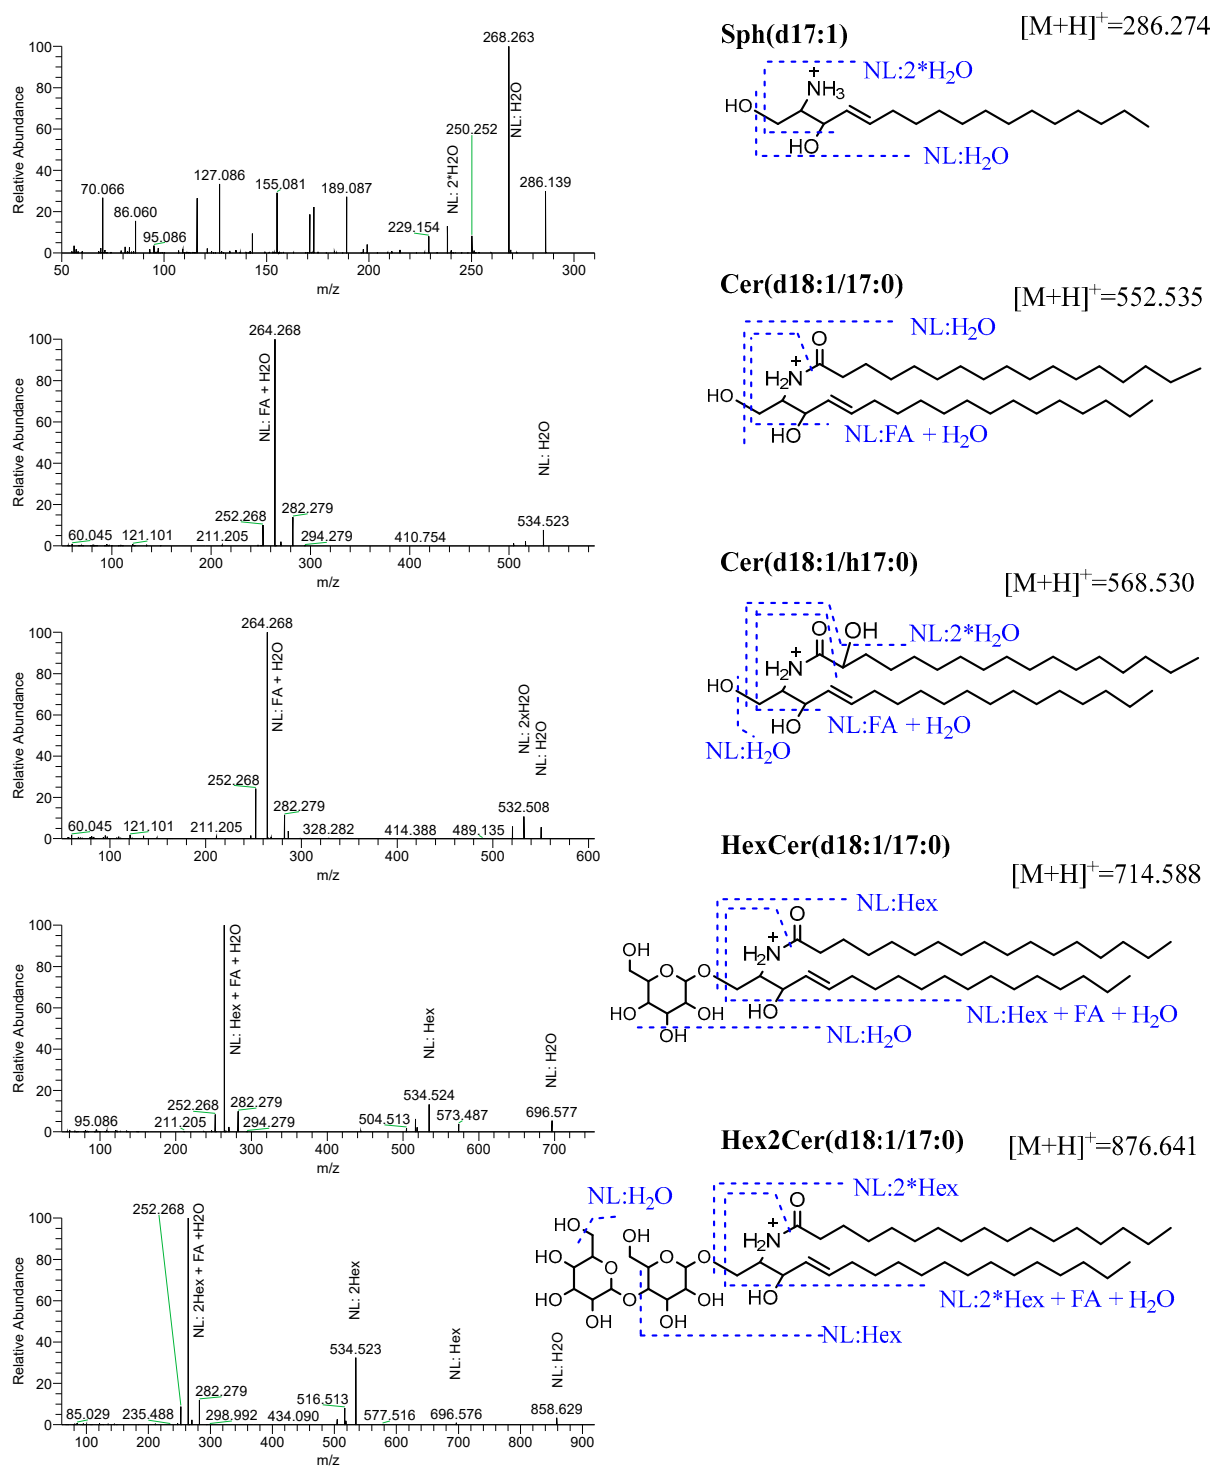

**Supplementary Figure S2: MS/MS spectrum in positive polarity of the five commercial standards used in method development for ceramides and glycosceramides.** Schematic molecular structures, with fragmentation patterns, are depicted on the right and correlated with the masses annotated in the spectrum., matching theoretical values within a 10 ppm tolerance threshold.

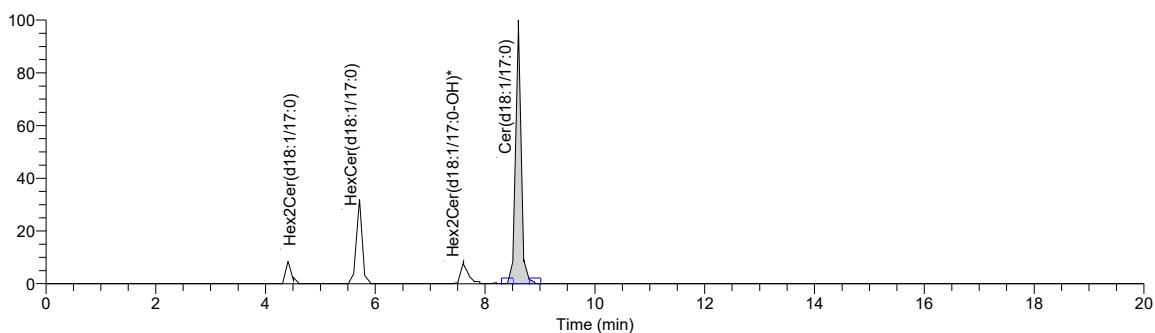

**Supplementary Figure S3: LC-MS/MS chromatogram for the commercial standard Cer(d18:1/17:0).** Correct signal appears at 8.8 min (shaded). The other ghost peaks belong to in-source fragmentation of other structures. Hex2Cer(d18:1/17:0) interferes in the chromatogram through in-source loss of the 2 hexoses of the glycan moiety (4.7 min). HexCer(d18:1/17:0) generates a ghost peak by release of its hexose. (5.9 min). Cer(d18:1/h17:0) easily decomposes by loss of a water molecule from the hydroxylated fatty acid, in such a way that the 2nd isotopic peak is present in the chromatogram of the non-hydroxylated counterpart.

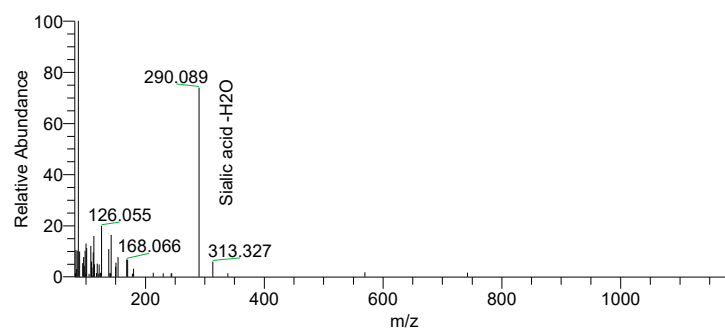

**Supplementary Figure S4: MS/MS spectrum in negative polarity of the GM3(d18:1/18:0-d5) standard used in method development for ganglioside analysis.** Mass annotated in the spectrum matches theoretical values, within 10 ppm tolerance, of the fragment ion consisting of the deprotonated sialic acid unit.

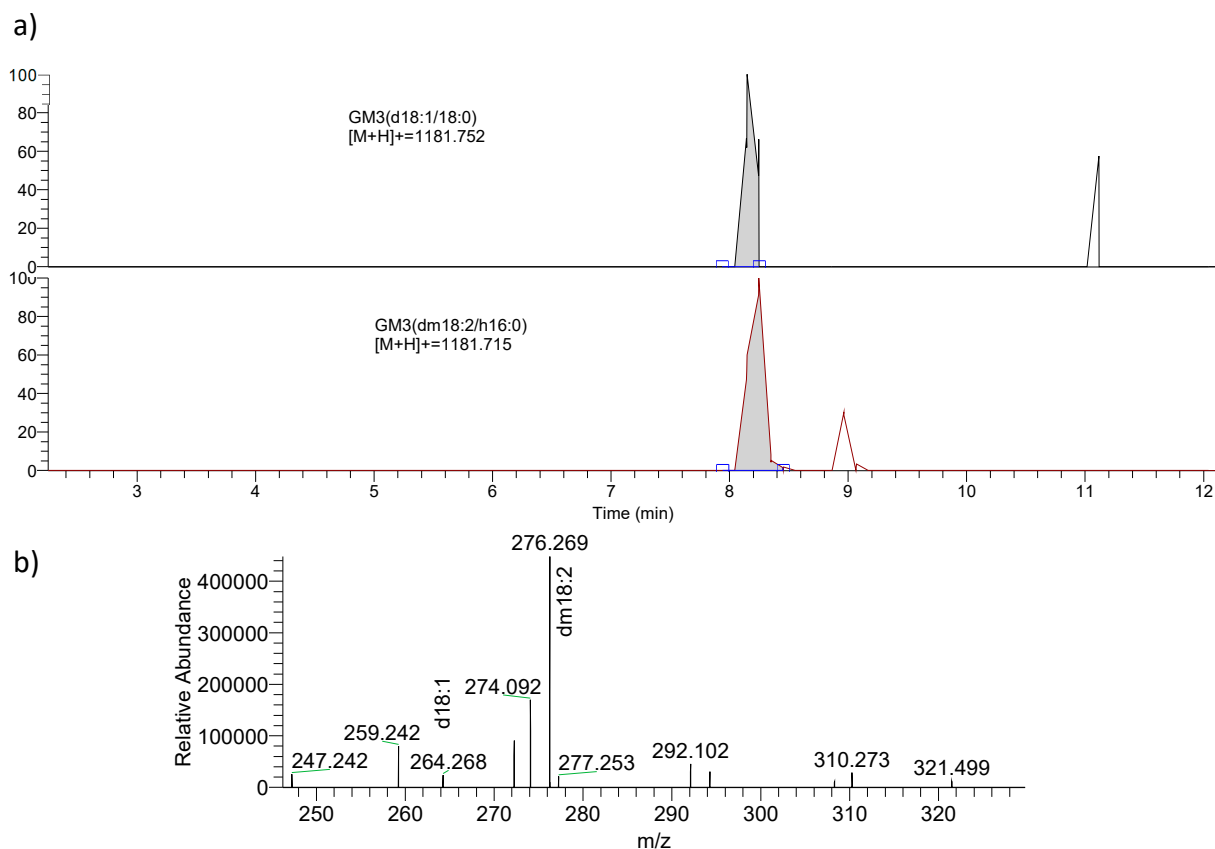

**Supplementary Figure S5: a) LC-MS/MS chromatogram in positive polarity, based on the sphingoid base fragment ion, for the isobaric species GM3(d18:1/18:0) and GM3(d18:2/h16:0), that elute at similar retention times. b) Chimeric MS/MS spectrum with information for both species, given that precursor ions have similar masses and retention times. Quantification is only possible when using MS/MS fragments that allow unequivocal identification, such as the annotated ions corresponding to the sphingoid base.**

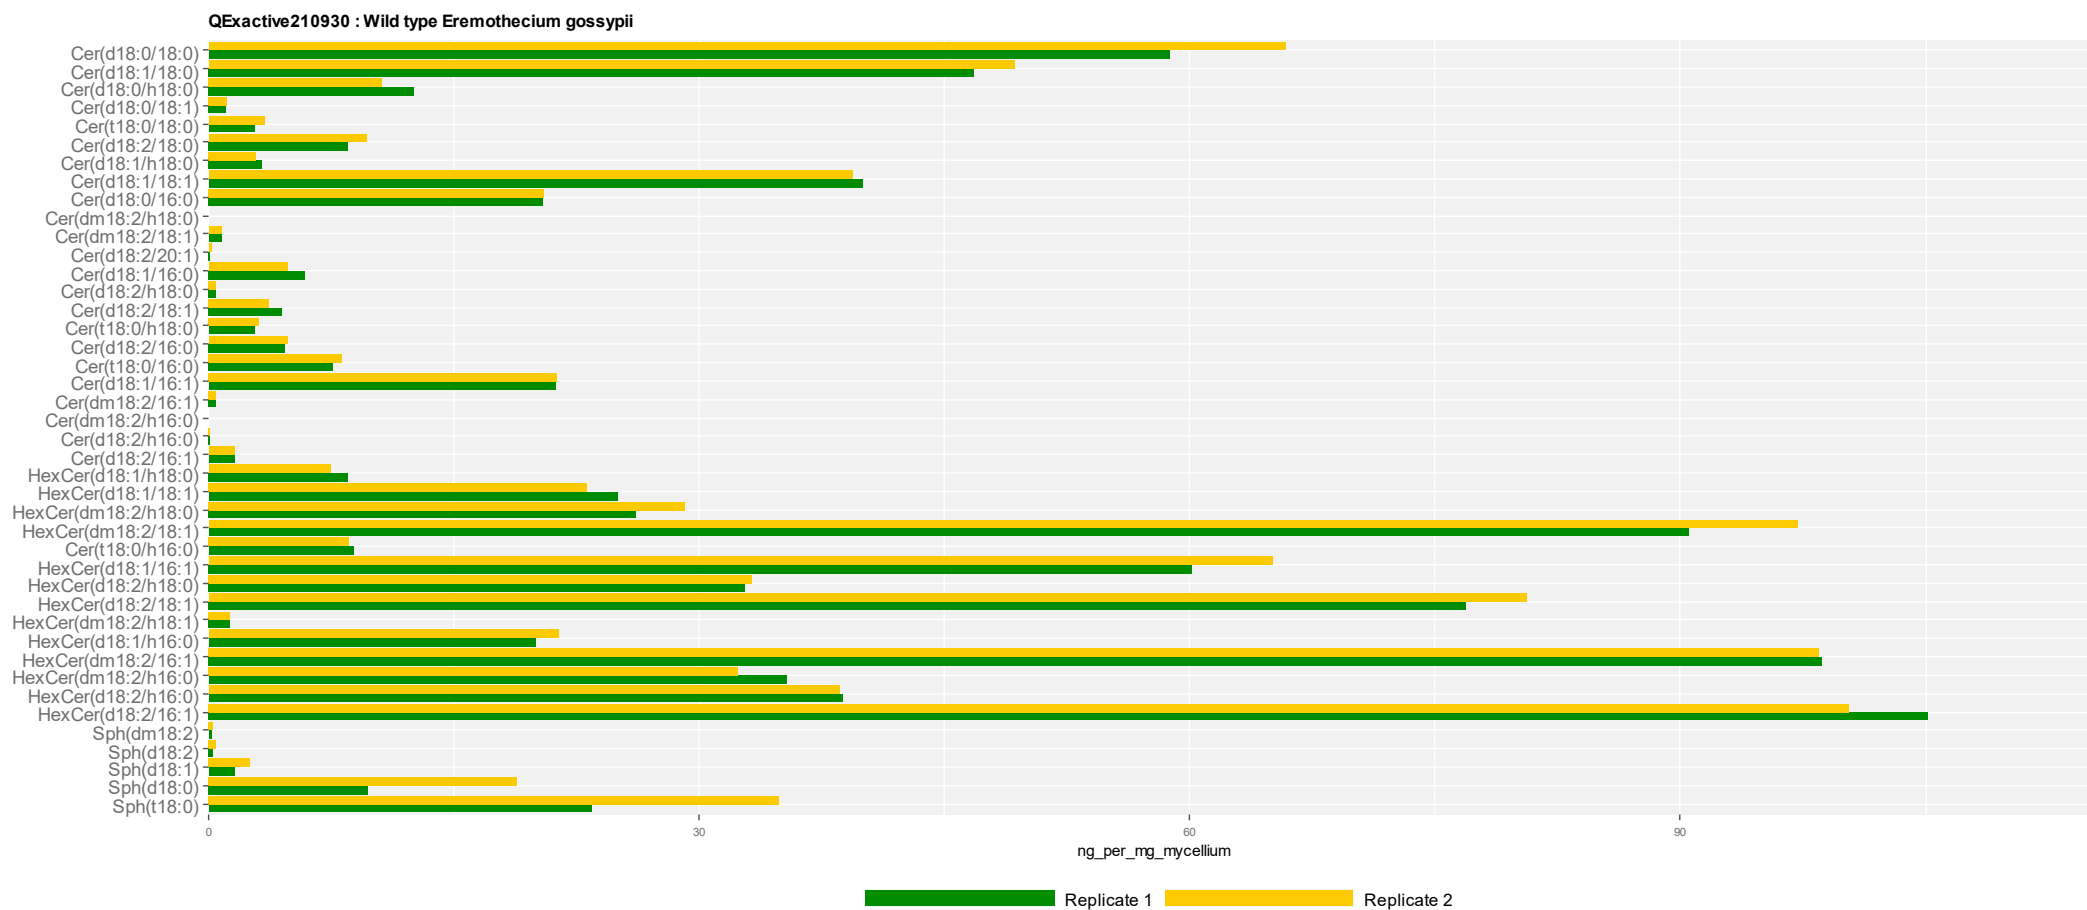

**Supplementary Figure S6: Quantitative LC-MS/MS analysis of ceramides (Cer) and glucosyl ceramides (HexCer) in a biological matrix extracted from the wild type fungus *Eremothecium gossypii*.** Quantitative values were extrapolated using internal standards for each group of molecules and calculated versus the initial amount of the mycelia of fungus obtained. A total of 42 species in the wild type organism were detected, including the five sphingoid types

and occasionally alpha-hydroxylation in the fatty acyl chain. Concentrations observed ranged between values close to the observed limit of detection, around one nanogram of the species per milligram of mycelium, and a few hundreds of ng per mg of mycelium.
